# Supplementary material for: Dietary pattern and its association with iodine deficiency among school children in southwest Ethiopia; A cross-sectional study
Source: PLOS journal article supplement (doi:10.1371/journal.pone.0221106), 2019-08-13
Supplement: S1 (10.1371/journal.pone.0221106.s001) [file journal.pone.0221106.s001]

### English version Questionnaire

Questionnaire code: \_\_\_\_\_

Woreda name: \_\_\_\_\_

Woreda code: \_\_\_\_\_ Altitude: \_\_\_\_\_

School name: \_\_\_\_\_

School code: \_\_\_\_\_

Date: \_\_\_\_\_

#### **Part I - socio-demographic characteristics**

| S.No | Questions                                                          | Responses                                                                                                                              |
|------|--------------------------------------------------------------------|----------------------------------------------------------------------------------------------------------------------------------------|
| 101  | What is your age?                                                  | _____ Years                                                                                                                            |
| 102  | What is your religion?                                             | 1. Orthodox<br>2. Muslim<br>3. Protestant<br>4. Other _____                                                                            |
| 103  | What is your ethnicity?                                            | 1. Bench<br>2. Amhara<br>3. Sheko<br>4. Keffa<br>5. Tigre<br>6. Other _____                                                            |
| 104  | Place of residence                                                 | 1. Urban<br>2. Rural                                                                                                                   |
| 105  | What is your marital status                                        | 1. Single<br>2. Married<br>3. Divorced<br>4. Widowed<br>5. Separated                                                                   |
| 106  | What is the highest level of school you attended?                  | 1. Cannot read and write<br>2. Primary education(1-8)<br>3. High school education(9-12)<br>4. Tertiary education( college, university) |
| 107  | What is the highest level of school your husband/partner attended? | 1. Cannot read and write<br>2. Primary education(1-8)<br>3. High school (9-12)<br>4. Tertiary education( college, university)          |
| 108  | What is your occupation?                                           | 1. Housewife<br>2. Farmer<br>3. Merchant<br>4. Government employee<br>5. Self-employee<br>6. Daily laborer<br>7. Other _____           |
| 109  | What is your husband/partner occupation?                           | 1. Farmer<br>2. Merchant<br>3. Government employee<br>4. Self-employee                                                                 |

|     |                                 |                                    |
|-----|---------------------------------|------------------------------------|
|     |                                 | 5. Daily laborer<br>6. Other _____ |
| 110 | Family size (number)            | _____                              |
| 111 | Estimated family monthly income | _____ Ethiopian Birr               |

## **Part II - Household Wealth Assessment**

| S.no | Questions                                                                     | Responses                                                                                                                    |
|------|-------------------------------------------------------------------------------|------------------------------------------------------------------------------------------------------------------------------|
| 201  | Main material of the floor of house                                           | 1. Soil/sand<br>2. Wood planks<br>3. Cement<br>4. Ceramic tiles<br>5. Others(specify) _____                                  |
| 202  | Main material of roof                                                         | 1. Thatch<br>2. Corrugated iron/metal<br>3. Cement<br>4. Others (specify) _____                                              |
| 203  | Does member of this household own,                                            |                                                                                                                              |
|      | A bicycle?                                                                    | 1. Yes    2. No                                                                                                              |
|      | A motorcycle?                                                                 | 1. Yes    2. No                                                                                                              |
|      | An animal-drawn cart?                                                         | 1. Yes    2. No                                                                                                              |
|      | A car or truck?                                                               | 1. Yes    2. No                                                                                                              |
| 204  | Does household own any agricultural land                                      | 1. Yes _____<br>2. No                                                                                                        |
| 205  | Does this household own any livestock, herds, other farm animals, or poultry? | 1. Yes<br>2. No                                                                                                              |
| 206  | Does the household own the following?<br>If yes please specify the amount     |                                                                                                                              |
|      | 1. Cows/bulls/oxen                                                            | 1. Yes _____ 2. No                                                                                                           |
|      | 2. Horses/donkeys/mules                                                       | 1. Yes _____ 2. No                                                                                                           |
|      | 3. Goats                                                                      | 1. Yes _____ 2. No                                                                                                           |
|      | 4. Sheep                                                                      | 1. Yes _____ 2. No                                                                                                           |
|      | 5. Chickens                                                                   | 1. Yes _____ 2. No                                                                                                           |
|      | 6. Beehives                                                                   | 1. Yes _____ 2. No                                                                                                           |
| 207  | How many of the following does this household own?                            | 1. Teff (kuntal) _____<br>2. Coffee (kilo) _____<br>3. Gold (gram) _____<br>4. Silver (gram) _____<br>5. Spices (kilo) _____ |
| 208  | Does this household have a bank or microfinance saving account?               | 1. Yes    2. No                                                                                                              |
| 209  | Does your household have:                                                     |                                                                                                                              |
|      | Electricity?                                                                  | 1. Yes    2. No                                                                                                              |
|      | A watch/clock?                                                                | 1. Yes    2. No                                                                                                              |
|      | A radio?                                                                      | 1. Yes    2. No                                                                                                              |
|      | A television?                                                                 | 1. Yes    2. No                                                                                                              |
|      | A mobile telephone?                                                           | 1. Yes    2. No                                                                                                              |
|      | A non-mobile telephone?                                                       | 1. Yes    2. No                                                                                                              |

|                                           |        |       |
|-------------------------------------------|--------|-------|
| A refrigerator?                           | 1. Yes | 2. No |
| A table? A chair?                         | 1. Yes | 2. No |
| A bed with cotton/sponge/spring mattress? | 1. Yes | 2. No |
| An electric oven?                         | 1. Yes | 2. No |
| A kerosene lamp/pressure lamp?            | 1. Yes | 2. No |

### **Part III – Iodized salt related awareness of the mother/caregiver and source of water**

| <b>S.No.</b> | <b>Questions</b>                                                         | <b>Response categories</b>                                                                                                                                                                                                                                                                                                                                                                                                                                                                                                                                           |
|--------------|--------------------------------------------------------------------------|----------------------------------------------------------------------------------------------------------------------------------------------------------------------------------------------------------------------------------------------------------------------------------------------------------------------------------------------------------------------------------------------------------------------------------------------------------------------------------------------------------------------------------------------------------------------|
| 301          | Have you ever heard about iodized salt?                                  | 1. Yes<br>2. No                                                                                                                                                                                                                                                                                                                                                                                                                                                                                                                                                      |
| 302          | If yes to Q 301, where do you get the information?                       | 1. Health workers<br>2. Friends<br>3. Relative<br>4. Family<br>5. Advertisements<br>6. Others (specify)_____                                                                                                                                                                                                                                                                                                                                                                                                                                                         |
| 303          | Could you able to differentiate iodized salt from non-iodized salt?      | 1. Yes<br>2. No                                                                                                                                                                                                                                                                                                                                                                                                                                                                                                                                                      |
| 304          | If yes to Q 303, how do you differentiate iodized salt?                  | 1. See the labeling<br>2. By the taste<br>3. By color<br>4. Others (specify)_____                                                                                                                                                                                                                                                                                                                                                                                                                                                                                    |
| 304          | Do you use salt for food?                                                | 1. Yes<br>2. No                                                                                                                                                                                                                                                                                                                                                                                                                                                                                                                                                      |
| 305          | If yes to Q 304, when do you add salt to the food                        | 1. Initial<br>2. Mid-point<br>3. At the end<br>4. After completed                                                                                                                                                                                                                                                                                                                                                                                                                                                                                                    |
| 306          | What is the main source of drinking water for members of your household? | <u>Piped water/supply water</u><br>Piped inside dwelling ..... 11<br>Piped to yard/plot..... 12<br>Public tap..... 13<br><u>Water from spring</u><br>Protected well/spring ..... 21<br>Unprotected well/spring..... 22<br><u>Water from Dug well</u><br>Protected well ..... 31<br>Unprotected well ..... 32<br><u>Water form borehole</u><br>Borehole in yard/plot ..... 41<br>Public borehole ..... 42<br><u>Surface water</u><br>Pond/lake/River/stream/spring/Dam.....51<br><u>Rain water</u> ..... 61<br><u>Tanker truck</u> ..... 71<br><u>Vendor</u> ..... 81 |

|     |                                                                                                              |                                                                                                                                                                                                                                                                                                                                                                                                                                                                                                                                                                                                                                                                              |
|-----|--------------------------------------------------------------------------------------------------------------|------------------------------------------------------------------------------------------------------------------------------------------------------------------------------------------------------------------------------------------------------------------------------------------------------------------------------------------------------------------------------------------------------------------------------------------------------------------------------------------------------------------------------------------------------------------------------------------------------------------------------------------------------------------------------|
|     |                                                                                                              | <u>Bottled water</u> ..... 91<br><u>No fixed facility</u> ..... 96<br><u>Other (specify)</u> ..... 99                                                                                                                                                                                                                                                                                                                                                                                                                                                                                                                                                                        |
| 307 | What is the main source of water used by your household for other purposes such as cooking and hand washing? | <u>Piped water/supply water</u><br>Piped inside dwelling ..... 11<br>Piped to yard/plot..... 12<br>Public tap..... 13<br><u>Water from spring</u><br>Protected well/spring ..... 21<br>Unprotected well/spring..... 22<br><u>Water from Dug well</u><br>Protected well ..... 31<br>Unprotected well ..... 32<br><u>Water form borehole</u><br>Borehole in yard/plot..... 41<br>Public borehole ..... 42<br><u>Surface water</u><br>Pond/lake/River/stream/spring/Dam.....51<br><u>Rain water</u> ..... 61<br><u>Tanker truck</u> ..... 71<br><u>Vendor</u> ..... 81<br><u>Bottled water</u> ..... 91<br><u>No fixed facility</u> ..... 96<br><u>Other (specify)</u> ..... 99 |

**Part IV - Helen Keller Modified food frequency questionnaire (FFQ)**

| Food frequency questionnaire to be answered by mothers |          |            |        |            |       |
|--------------------------------------------------------|----------|------------|--------|------------|-------|
| Food item                                              | ≥ 1x/day | 3-6x/ week | 1-2x/w | ≤ 2x/month | Never |
| <b>Cereals/cereal based food items</b>                 |          |            |        |            |       |
| Teff                                                   |          |            |        |            |       |
| Sorghum                                                |          |            |        |            |       |
| Millet                                                 |          |            |        |            |       |
| Corn                                                   |          |            |        |            |       |
| Wheat                                                  |          |            |        |            |       |
| Barley                                                 |          |            |        |            |       |
| Macaroni                                               |          |            |        |            |       |
| Spaghetti                                              |          |            |        |            |       |
| Rice                                                   |          |            |        |            |       |
| <b>Vegetables</b>                                      |          |            |        |            |       |
| Tomato                                                 |          |            |        |            |       |
| Potatoes                                               |          |            |        |            |       |
| Beetroot                                               |          |            |        |            |       |
| Collard green                                          |          |            |        |            |       |
| Cabbage                                                |          |            |        |            |       |
| Abyssinian cabbage                                     |          |            |        |            |       |
| Carrot                                                 |          |            |        |            |       |
| Lettuce                                                |          |            |        |            |       |
| Sweet potatoes                                         |          |            |        |            |       |
| Cocumber                                               |          |            |        |            |       |
| <b>Roots</b>                                           |          |            |        |            |       |
| Godere                                                 |          |            |        |            |       |
| Ensete                                                 |          |            |        |            |       |
| <b>Pulses</b>                                          |          |            |        |            |       |
| Beans                                                  |          |            |        |            |       |
| Peas                                                   |          |            |        |            |       |
| Kidney beans                                           |          |            |        |            |       |
| Lentils                                                |          |            |        |            |       |
| Chickpeas                                              |          |            |        |            |       |
| Haricot beans                                          |          |            |        |            |       |
| <b>Fruits</b>                                          |          |            |        |            |       |
| Orange                                                 |          |            |        |            |       |
| Banana                                                 |          |            |        |            |       |
| Mango                                                  |          |            |        |            |       |
| Avocado                                                |          |            |        |            |       |
| Papaya                                                 |          |            |        |            |       |
| Guava                                                  |          |            |        |            |       |

|                 |  |  |  |  |  |
|-----------------|--|--|--|--|--|
| Animal products |  |  |  |  |  |
| Egg             |  |  |  |  |  |
| Beef            |  |  |  |  |  |
| Milk            |  |  |  |  |  |
| Fish            |  |  |  |  |  |
| Chicken         |  |  |  |  |  |

### **Part V - Child characteristics**

| Sn. No | Questionnaire               | Responses                                                                        |
|--------|-----------------------------|----------------------------------------------------------------------------------|
| 501    | Child ID                    | _____                                                                            |
| 502    | What is the age of a child? | _____year and _____months                                                        |
| 503    | What is the sex of a child? | 1. Boy<br>2. Girl                                                                |
| 504    | School grade of the child?  | 1. Grade 1<br>2. Grade 2<br>3. Grade 3<br>4. Grade 4<br>5. Grade 5<br>6. Grade 6 |

### **Part VI - Anthropometric and thyroid palpation of the child**

Child ID \_\_\_\_\_ Age \_\_\_\_\_

| S.No. | Activity                            | Result                                 | remark |
|-------|-------------------------------------|----------------------------------------|--------|
| 601   | Height                              | _____ cm                               |        |
| 602   | Weight                              | _____ Kg                               |        |
| 603   | Thyroid gland palpation and staging | 1. grade 0<br>2. grade 1<br>3. grade 2 |        |

### **Part VII - salt sample test reporting format**

Child ID \_\_\_\_\_ Age \_\_\_\_\_

| S.No. | Type of test      | Result                                                              | Remark |
|-------|-------------------|---------------------------------------------------------------------|--------|
| 701   | Simple rapid test | 1. 0 ppm (white)<br>2. <15ppm (light grey)<br>3. >15ppm (dark grey) |        |

**Part VIII - Laboratory result reporting format**

Name of health institution-----

Child *ID* -----

Age.....

|   | Type of test                 | Result       | Remark |
|---|------------------------------|--------------|--------|
| 1 | Urinary iodine concentration | UIC_____µg/L |        |

Name of laboratory investigator-----

Signature-----

Date-----
